# Supplementary material for: Considering the chemical energy requirements of the tri-n-propylamine co-reactant pathways for the judicious design of new electrogenerated chemiluminescence detection systems
Source: Royal Society of Chemistry journal article supplement (doi:10.1039/c5an01462j), 2015-11-03
Supplement: c5an01462j1.pdf [file c5an01462j1.pdf]

Electronic Supporting Information for:

## Considering the chemical energy requirements of the tri-*n*-propylamine co-reactant pathways for the judicious design of new electrogenerated chemiluminescence detection systems

Emily Kerr, Egan H. Doeven, David J.D. Wilson, Conor F. Hogan, and Paul S. Francis\*

**Table S1.** Data for Figures 1-6: metal complexes in acetonitrile solution.<sup>1, 2</sup>

| Complex                                      | $E_{\text{ox}} / \text{V (vs Fc}^{0/+}$ ) | $E_{\text{red}} / \text{V (vs Fc}^{0/+}$ ) | $\lambda_{\text{max}} / \text{nm}$ |
|----------------------------------------------|-------------------------------------------|--------------------------------------------|------------------------------------|
| [Ru(bpy) <sub>3</sub> ] <sup>2+</sup>        | 0.89                                      | -1.75                                      | 620                                |
| [Ir(ppy) <sub>2</sub> (phen)] <sup>+</sup>   | 0.77 <sup>a</sup>                         | -1.85 <sup>a</sup>                         | 606                                |
| [Ir(ppy) <sub>3</sub> ]                      | 0.33                                      | -2.67                                      | 530                                |
| [Ir(df-ppy) <sub>3</sub> ]                   | 0.68                                      | -2.53                                      | 492                                |
| [Ir(df-ppy) <sub>2</sub> (ptb)] <sup>+</sup> | 1.17                                      | -2.14                                      | 455                                |
| [Ir(pmi) <sub>3</sub> ]                      | 0.22                                      | <sup>b</sup>                               | 384                                |
| [Ir(pq) <sub>2</sub> (tmd)]                  | 0.53 <sup>a</sup>                         | -2.01 <sup>a</sup>                         | 615                                |
| [Ir(pq) <sub>2</sub> (acac)]                 | 0.61 <sup>a</sup>                         | -2.05 <sup>a</sup>                         | 609                                |

<sup>a</sup>Reported in original work<sup>1</sup> in V vs SCE and referenced to Fc<sup>0/+</sup> using a conversion factor of -0.38 V.<sup>3</sup> <sup>b</sup>Beyond the potential window of the solvent.

**Table S2.** Data for Figure 7: metal complexes in aqueous solution.<sup>4</sup>

| Complex                                                       | $E_{\text{ox}} / \text{V (vs Ag/AgCl)}$ | $E_{\text{red}} / \text{V (vs Ag/AgCl)}$ | $\lambda_{\text{max}} / \text{nm}$ |
|---------------------------------------------------------------|-----------------------------------------|------------------------------------------|------------------------------------|
| [Ir(df-ppy) <sub>2</sub> (pt-PEG)] <sup>+</sup>               | 1.43                                    | -1.69                                    | 456                                |
| [Ir(df-ppy-SO <sub>3</sub> ) <sub>2</sub> (ptb)] <sup>-</sup> | 1.47                                    | -1.69                                    | 462                                |

### References

1. J. I. Kim, I.-S. Shin, H. Kim and J.-K. Lee, *J. Am. Chem. Soc.*, 2005, **127**, 1614-1615.
2. G. J. Barbante, E. H. Doeven, E. Kerr, T. U. Connell, P. S. Donnelly, J. M. White, T. Lópes, S. Laird, C. F. Hogan, D. J. D. Wilson, P. J. Barnard and P. S. Francis, *Chem. Eur. J.*, 2014, **20**, 3322-3332; E. Kerr, E. H. Doeven, G. J. Barbante, C. F. Hogan, D. Bower, P. S. Donnelly, T. U. Connell and P. S. Francis, *Chem. Sci.*, 2015, **6**, 472-479.
3. V. V. Pavlishchuk and A. W. Addison, *Inorg. Chim. Acta*, 2000, **298**, 97-102.
4. E. Kerr, E. H. Doeven, G. J. Barbante, T. U. Connell, P. S. Donnelly, D. J. D. Wilson, T. D. Ashton, F. M. Pfeffer and P. S. Francis, *Chem. - Eur. J.*, 2015, DOI: 10.1002/chem.201502037.
